# Supplementary material
Source: ML conference proceedings conference paper supplement (https://openaccess.thecvf.com/content/CVPR_2019/html/Swoboda_A_Convex_Relaxation_CVPR_2019_paper.html)
Supplement: Supplementary file 1 [file Swoboda_A_Convex_Relaxation_CVPR_2019_supplemental.pdf]

## A. Appendix

*Proof of Proposition 1.* Cycle consistency amounts to the following property: Whenever there is a path  $p_1, \dots, p_k$  with  $p_i \in [d]$  and nodes  $s_1, \dots, s_k$  with  $s_i \in [m_{p_i}]$  such that  $X_{s_i s_{i+1}}^{[p_i p_{i+1}]} = 1$  then it must hold that  $X_{s_1 s_k}^{[p_1 p_k]} = 1$  as well. The constraints  $X^{[pq]} X^{[qr]} \leq X^{[pr]}$  enforce the above constraints for paths of length three. By triangulation we can extend this equation to paths of arbitrary length. We use the path  $p_1, \dots, p_k$  with  $p_i \in [d]$  as above. Then

$$\begin{aligned} & X^{[p_1 p_2]} \cdot X^{[p_2 p_3]} \cdot \dots \cdot X^{[p_{k-1} p_k]} \\ & \leq X^{[p_1 p_3]} \cdot \dots \cdot X^{[p_{k-1} p_k]} \\ & \dots \\ & \leq X^{[p_1 p_{k-1}]} \cdot X^{[p_{k-1} p_k]} \\ & \leq X^{[p_1 p_k]}. \end{aligned}$$

□

**Example 1** (A minimal non-cycle consistent problem). Consider the following multi-graph matching instance (1) with  $d = 3$  and  $m_p = 2 \forall p \in [d]$ . Let

$$W^{[12]} = W^{[13]} = W^{[23]} = \text{diag}(-1, -10, -10, -1). \quad (24)$$

Then without cycle consistency constraints the optimal assignment will be

$$X^{[12]} = X^{[13]} = X^{[23]} = \begin{pmatrix} 0 & 1 \\ 1 & 0 \end{pmatrix} \quad (25)$$

with objective value  $-60$ . After adding cycle-consistency constraints an optimal solution is

$$X^{[12]} = X^{[13]} = \begin{pmatrix} 0 & 1 \\ 1 & 0 \end{pmatrix}, \quad X^{[23]} = \begin{pmatrix} 1 & 0 \\ 0 & 1 \end{pmatrix} \quad (26)$$

with objective value  $-42$ .

### A.1. Cutting planes with cycle consistency subproblems

Algorithm 2 proceeds by first computing the dual lower bound of all subproblems that are connected to a given cycle consistency subproblem  $x^{[pqr],st}$  (line 1). Then messages are sent to  $x^{[pqr],st}$  from all factors that are connected to it (lines 2-9). Finally, the lower bound after these operations is computed (line 10) and the initial reparametrization is restored (lines 11-14).

---

#### Algorithm 2: Dual lower bound increase for $x^{[pqr],st}$

---

```

/* lower bound without cycle
consistency subproblem  $x^{[pqr],st}$  */
1  $lb^0 =$ 
     $\min_{x \in \bar{Y}^{[pr],s}} \langle \bar{\theta}^{[pq],s}, x \rangle + \min_{x \in Y^{[qr],t}} \langle \theta^{[qr],t}, x \rangle +$ 
     $\min_{x \in Y^{[pr],s}} \langle \theta^{[pr],s}, x \rangle + \min_{x \in \bar{Y}^{[pr],t}} \langle \bar{\theta}^{[pr],t}, x \rangle;$ 
/* send messages to cycle
consistency subproblem  $x^{[pqr],st}$  */
2  $\bar{\Delta}^{[pq],s} = \text{msg}(\bar{x}^{[pq],s}, x^{[pqr],st});$ 
3  $\Delta^{[pq],t} = \text{msg}(x^{[qr],t}, x^{[pqr],st});$ 
4  $\Delta^{[pr],t} = \text{msg}(x^{[pr],t}, x^{[pqr],st});$ 
5  $\bar{\Delta}^{[qr],s} = \text{msg}(\bar{x}^{[qr],s}, x^{[pqr],st});$ 
6  $\text{reparam}(\bar{\Delta}^{[pq],s}, \bar{x}^{[pq],s}, x^{[pqr],st});$ 
7  $\text{reparam}(\Delta^{[pq],t}, \bar{x}^{[pq],t}, x^{[pqr],st});$ 
8  $\text{reparam}(\Delta^{[pr],t}, \bar{x}^{[pr],t}, x^{[pqr],st});$ 
9  $\text{reparam}(\bar{\Delta}^{[qr],s}, \bar{x}^{[qr],s}, x^{[pqr],st});$ 
/* lower bound after adding cycle
consistency subproblem  $x^{[pqr],st}$  */
10  $lb^1 =$ 
     $\min_{x \in \bar{Y}^{[pr],s}} \langle \bar{\theta}^{[pq],s}, x \rangle + \min_{x \in Y^{[qr],t}} \langle \theta^{[qr],t}, x \rangle +$ 
     $\min_{x \in Y^{[pr],s}} \langle \theta^{[pr],s}, x \rangle + \min_{x \in \bar{Y}^{[pr],t}} \langle \bar{\theta}^{[pr],t}, x \rangle +$ 
     $\min_{(a,b,c) \in Y^{[pqr],st}} \langle \theta^{[pqr],st}, (a, b, c) \rangle;$ 
/* restore original
reparametrization */
11  $\text{reparam}(-\bar{\Delta}^{[pq],s}, \bar{x}^{[pq],s}, x^{[pqr],st});$ 
12  $\text{reparam}(-\Delta^{[pq],t}, \bar{x}^{[pq],t}, x^{[pqr],st});$ 
13  $\text{reparam}(-\Delta^{[pr],t}, \bar{x}^{[pr],t}, x^{[pqr],st});$ 
14  $\text{reparam}(-\bar{\Delta}^{[qr],s}, \bar{x}^{[qr],s}, x^{[pqr],st});$ 
15 return  $lb^1 - lb^0;$ 

```

---
